# Supplementary material for: Efficient aerobic oxidative desulfurization over Co–Mo–O bimetallic oxide catalysts
Source: Royal Society of Chemistry journal article supplement (doi:10.1039/c9cy00459a), 2019-01-01
Supplement: c9cy00459a1.pdf [file c9cy00459a1.pdf]

Supplementary Information

**Efficient aerobic oxidative desulfurization over Co-Mo-O  
bimetallic oxides catalyst**

Qing Zhang, Jinhao Zhang, Huawei Yang\*, Yilin Dong, Yu Liu, Lixia Yang, Donglei

Wei, Wenxiang Wang, Liangjiu Bai, Hou Chen\*

*Shandong Key University Laboratory of High Performance and Functional Polymer, School  
of Chemistry and Materials Science, Ludong University, Yantai, 264025, China.*

Corresponding author: Huawei Yang, PhD and Hou Chen, PhD

Shandong Key University Laboratory of High Performance and Functional Polymer,  
School of Chemistry and Materials Science, Ludong University, Yantai, 264025, China

E-mail: huaweiyang@ldu.edu.cn (H. Yang); chenhou@ldu.edu.cn (H. Chen)

Tel.: +86-535-666-9070, Fax: +86-535-669-6162

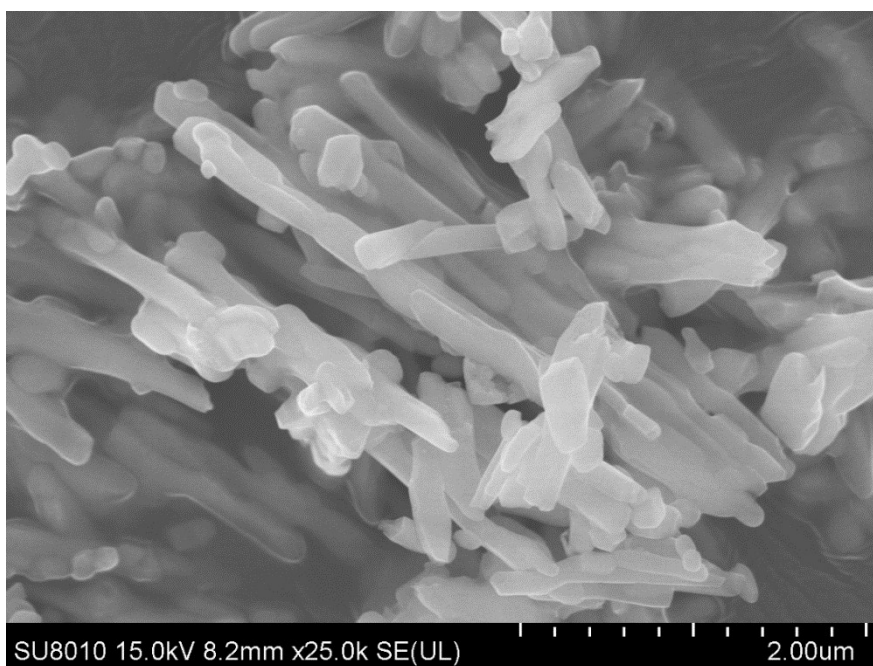

**Fig. S1** SEM image of the CoMoO.

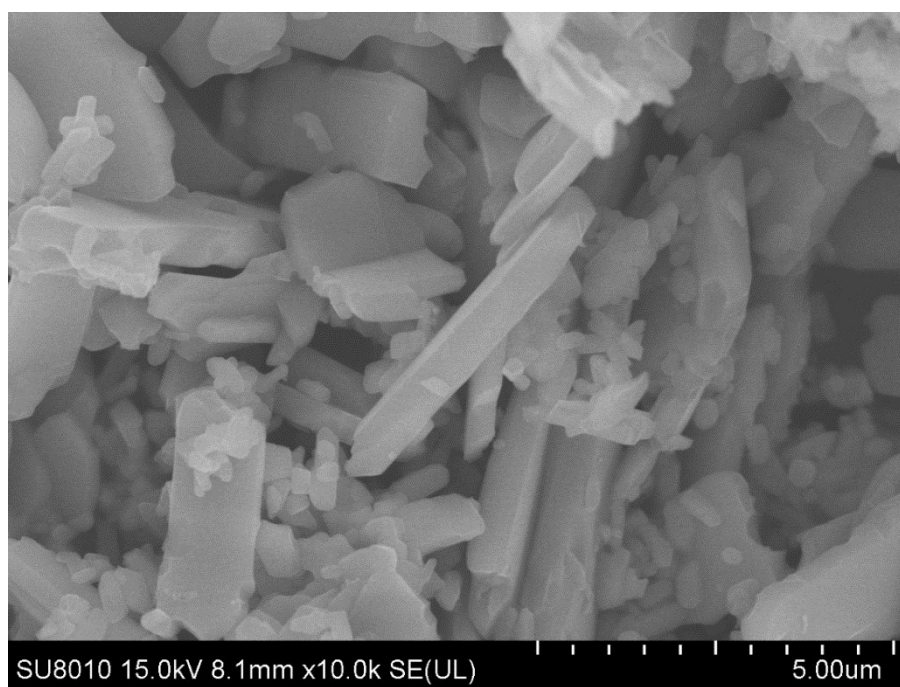

**Fig. S2** SEM image of the CoMo<sub>2</sub>O.

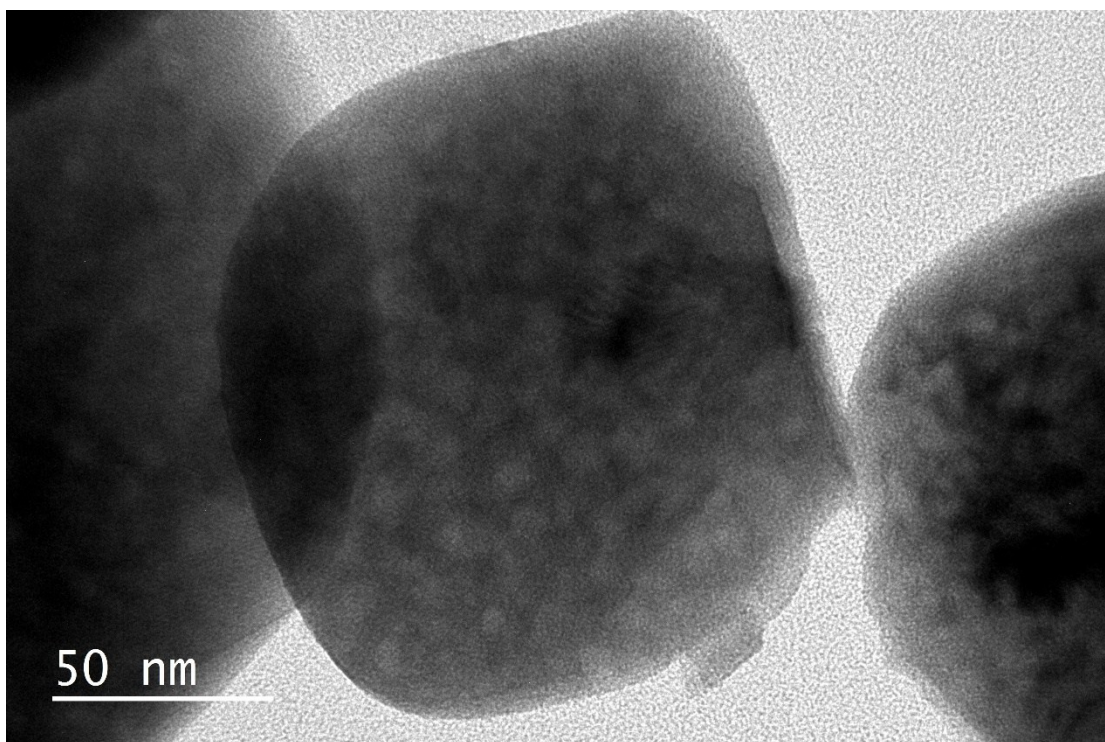

**Fig. S3** TEM image of the Co<sub>2</sub>MoO<sub>4</sub>.

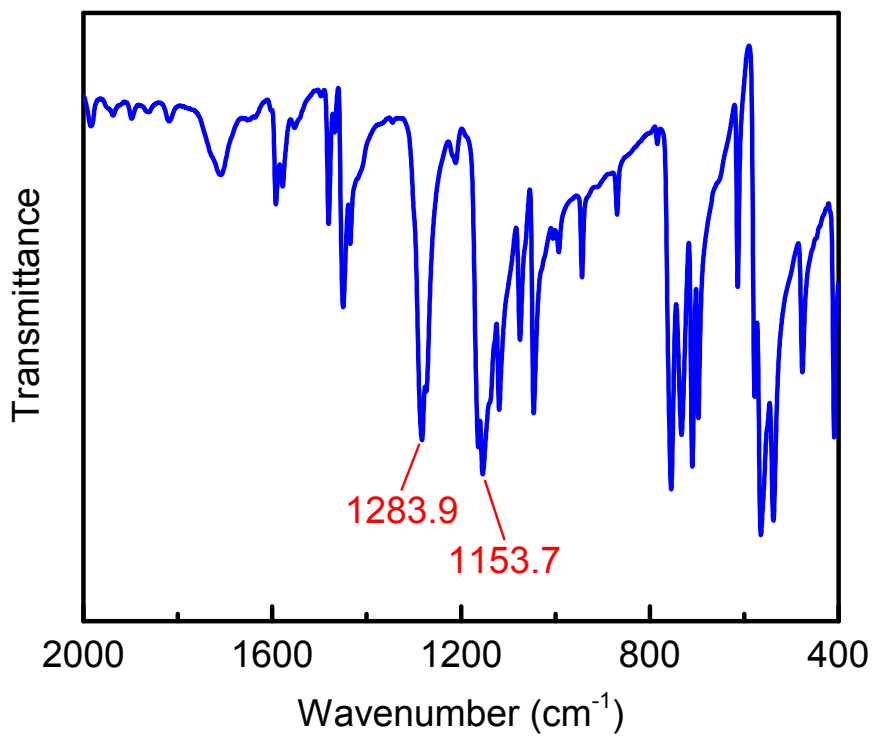

**Fig. S4** FT-IR spectrum of the oxidation product of DBT.

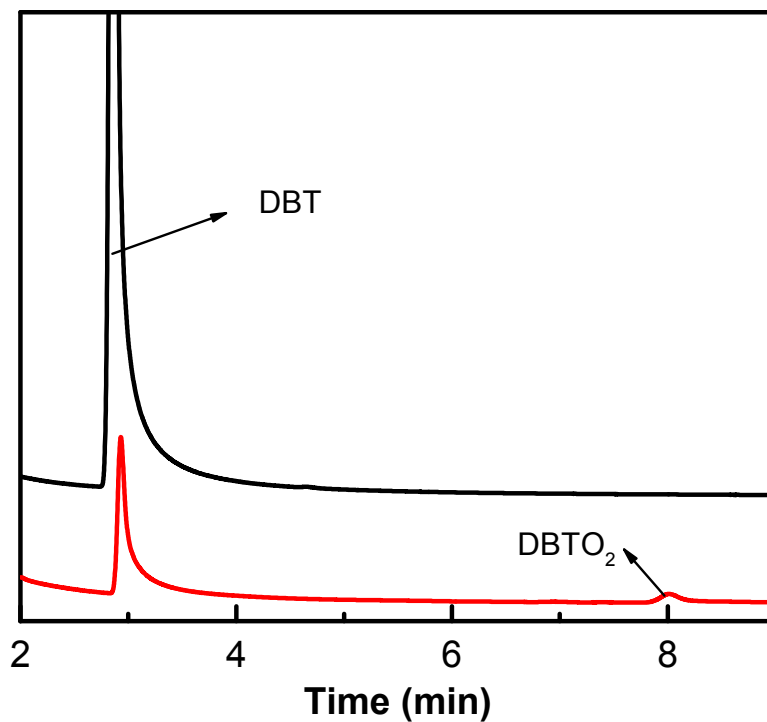

**Fig. S5** GC chromatograms of the oil phase before and after the reaction.

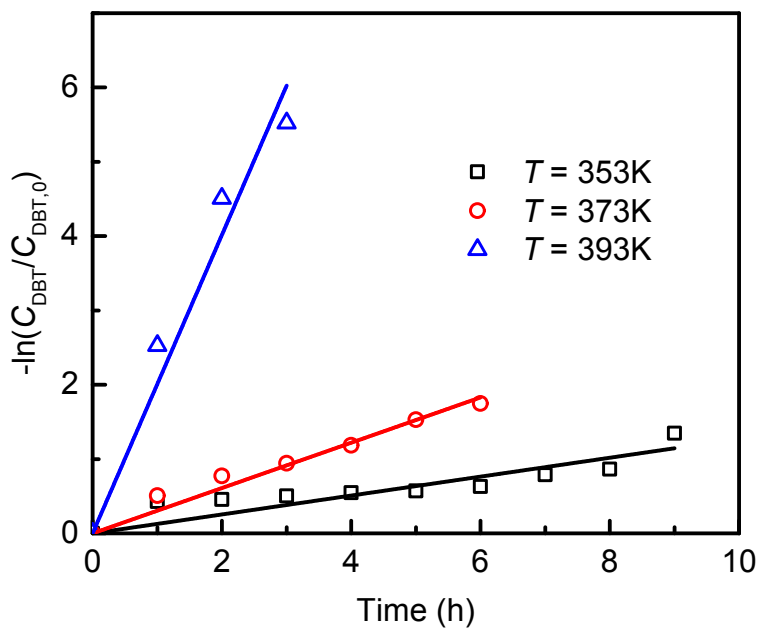

**Fig. S6** Fitting of the kinetic data with pseudo-first-order model.

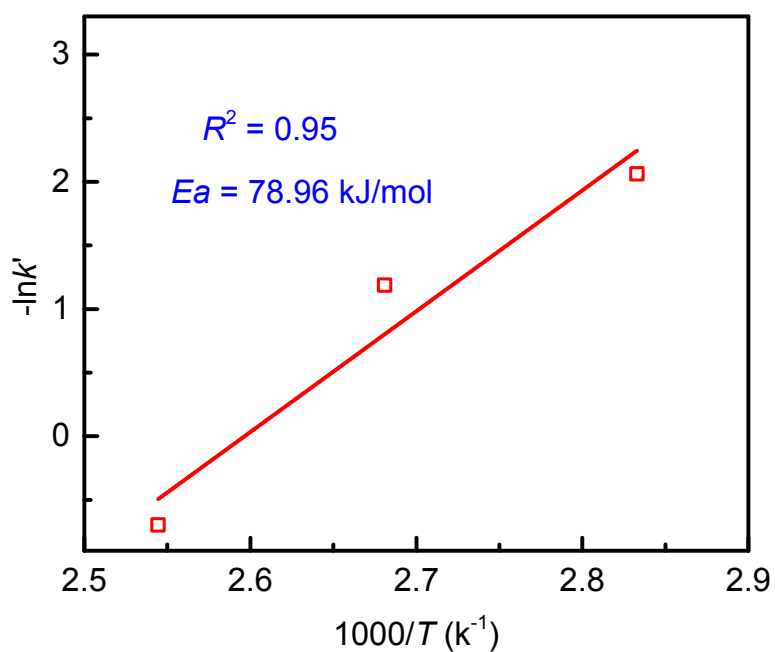

**Fig. S7** Calculation of activation energy with Arrhenius equation.

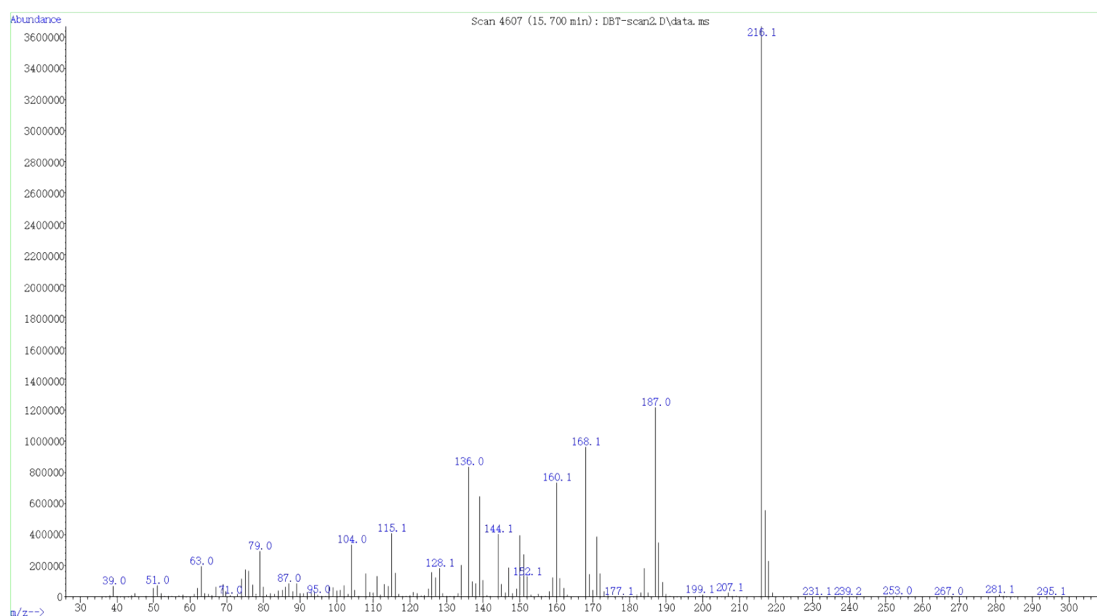

**Fig. S8** Mass spectrometry of dibenzothiophene sulfone (DBTO<sub>2</sub>).

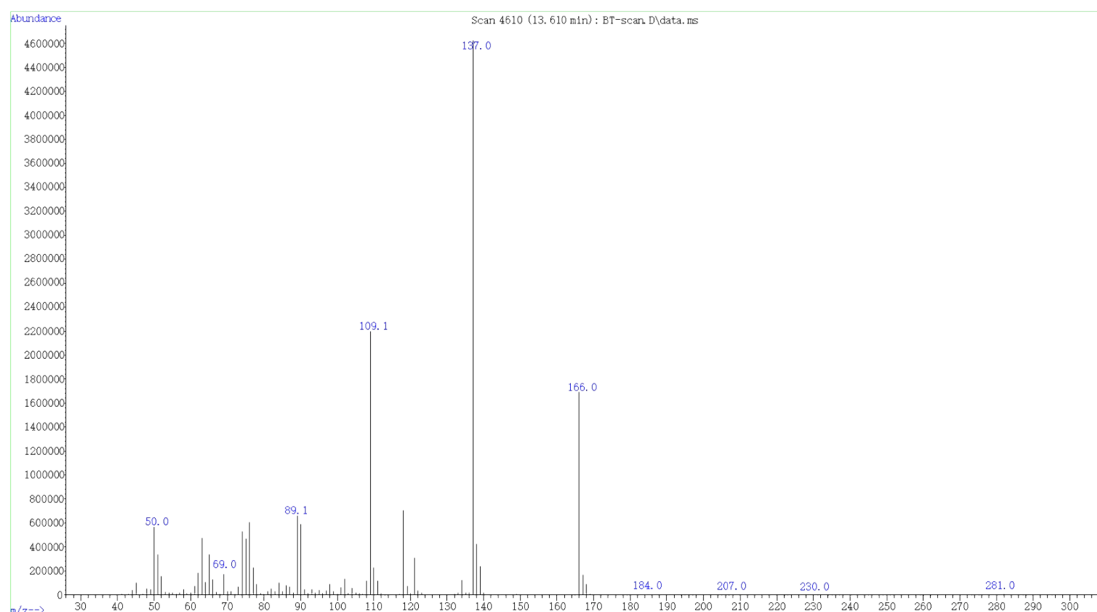

**Fig. S9** Mass spectrometry of benzothiophene sulfone (BTO<sub>2</sub>).

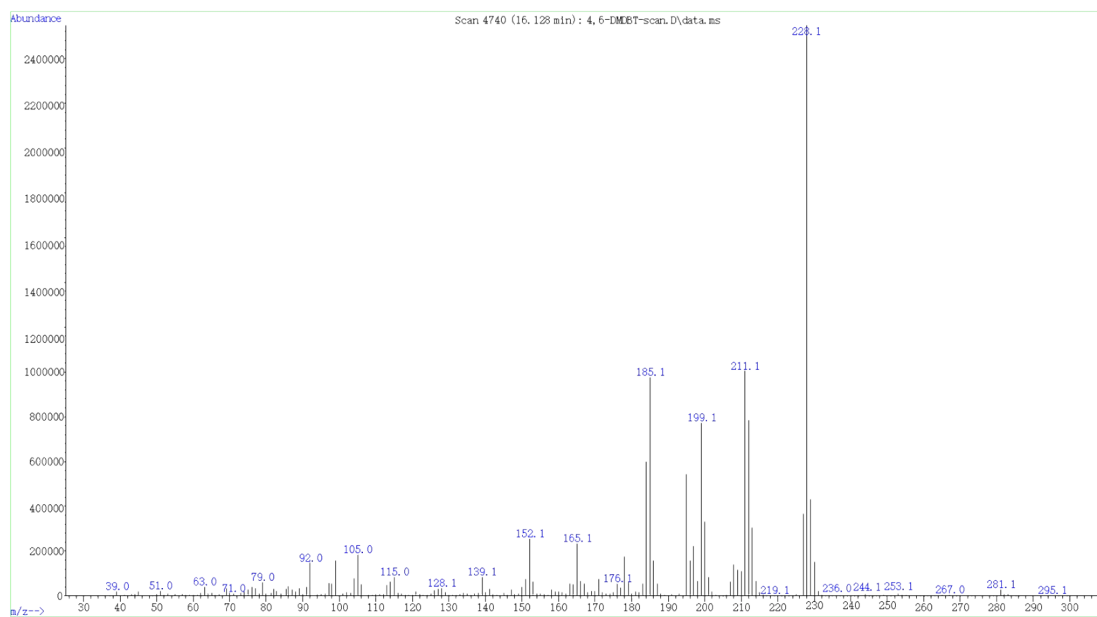

**Fig. S10** Mass spectrometry of 4,6-dimethyldibenzothiophene sulfone (4,6-DMDBTO<sub>2</sub>).
